# Supplementary material for: Formative independent evaluation of a digital change programme in the English National Health Service: study protocol for a longitudinal qualitative study
Source: PubMed Central journal article supplement (PMC7545630; doi:10.1136/bmjopen-2020-041275), 2020-10-08

# BMJ Open

BMJ Open is committed to open peer review. As part of this commitment we make the peer review history of every article we publish publicly available.

When an article is published we post the peer reviewers' comments and the authors' responses online. We also post the versions of the paper that were used during peer review. These are the versions that the peer review comments apply to.

The versions of the paper that follow are the versions that were submitted during the peer review process. They are not the versions of record or the final published versions. They should not be cited or distributed as the published version of this manuscript.

BMJ Open is an open access journal and the full, final, typeset and author-corrected version of record of the manuscript is available on our site with no access controls, subscription charges or pay-per-view fees (<http://bmjopen.bmj.com>).

If you have any questions on BMJ Open's open peer review process please email [info.bmjopen@bmj.com](mailto:info.bmjopen@bmj.com)

# BMJ Open

## The formative independent evaluation of a digital change programme in the English National Health Service: Study protocol for a longitudinal qualitative study

|                               |                                                                                                                                                                                                                                                                                                                                                                                                                                                                                                                                                    |
|-------------------------------|----------------------------------------------------------------------------------------------------------------------------------------------------------------------------------------------------------------------------------------------------------------------------------------------------------------------------------------------------------------------------------------------------------------------------------------------------------------------------------------------------------------------------------------------------|
| Journal:                      | <i>BMJ Open</i>                                                                                                                                                                                                                                                                                                                                                                                                                                                                                                                                    |
| Manuscript ID                 | bmjopen-2020-041275                                                                                                                                                                                                                                                                                                                                                                                                                                                                                                                                |
| Article Type:                 | Protocol                                                                                                                                                                                                                                                                                                                                                                                                                                                                                                                                           |
| Date Submitted by the Author: | 04-Jun-2020                                                                                                                                                                                                                                                                                                                                                                                                                                                                                                                                        |
| Complete List of Authors:     | Cresswell, Kathrin; University of Edinburgh, Sheikh, Aziz; University of Edinburgh, Division of Community Health Sciences<br>Dean Franklin, Bryony; University College London School of Pharmacy, Krasuska, Marta<br>Nguyen, Hung<br>Hinder, Susan<br>Lane, Wendy<br>Mozaffar, Hajar; University of Edinburgh<br>Mason, Kathy<br>Eason, Sally<br>Potts, Henry; UCL, Centre for Health Informatics and Multiprofessional Education<br>Williams, Robin; University of Edinburgh, School of Social and Political Science; The University of Edinburgh |
| Keywords:                     | QUALITATIVE RESEARCH, Health informatics < BIOTECHNOLOGY & BIOINFORMATICS, Health policy < HEALTH SERVICES ADMINISTRATION & MANAGEMENT                                                                                                                                                                                                                                                                                                                                                                                                             |
|                               |                                                                                                                                                                                                                                                                                                                                                                                                                                                                                                                                                    |

SCHOLARONE™  
Manuscripts

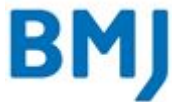

I, the Submitting Author has the right to grant and does grant on behalf of all authors of the Work (as defined in the below author licence), an exclusive licence and/or a non-exclusive licence for contributions from authors who are: i) UK Crown employees; ii) where BMJ has agreed a CC-BY licence shall apply, and/or iii) in accordance with the terms applicable for US Federal Government officers or employees acting as part of their official duties; on a worldwide, perpetual, irrevocable, royalty-free basis to BMJ Publishing Group Ltd ("BMJ") its licensees and where the relevant Journal is co-owned by BMJ to the co-owners of the Journal, to publish the Work in this journal and any other BMJ products and to exploit all rights, as set out in our [licence](#).

The Submitting Author accepts and understands that any supply made under these terms is made by BMJ to the Submitting Author unless you are acting as an employee on behalf of your employer or a postgraduate student of an affiliated institution which is paying any applicable article publishing charge ("APC") for Open Access articles. Where the Submitting Author wishes to make the Work available on an Open Access basis (and intends to pay the relevant APC), the terms of reuse of such Open Access shall be governed by a Creative Commons licence – details of these licences and which [Creative Commons](#) licence will apply to this Work are set out in our licence referred to above.

Other than as permitted in any relevant BMJ Author's Self Archiving Policies, I confirm this Work has not been accepted for publication elsewhere, is not being considered for publication elsewhere and does not duplicate material already published. I confirm all authors consent to publication of this Work and authorise the granting of this licence.

# The formative independent evaluation of a digital change programme in the English National Health Service: Study protocol for a longitudinal qualitative study

Kathrin Cresswell, Chief Scientist Office Chancellor's Fellow, Director of Innovation, Usher Institute of Population Health Sciences and Informatics, The University of Edinburgh, UK

Aziz Sheikh, Professor of Primary Care Research & Development and Director, Usher Institute of Population Health Sciences and Informatics, The University of Edinburgh, UK

Bryony Dean Franklin, Professor of Medication Safety, UCL School of Pharmacy, London, UK and Theme Lead, NIHR Imperial Patient Safety Translational Research Centre.

Marta Krasuska, Research Fellow, Usher Institute of Population Health Sciences and Informatics, The University of Edinburgh, UK

Hung The Nguyen, Research Fellow, Institute for the Study of Science, Technology and Innovation, The University of Edinburgh, Edinburgh, UK

Susan Hinder, Research Fellow, Institute for the Study of Science, Technology and Innovation, The University of Edinburgh, Edinburgh, UK

Wendy Lane, Consultancy Services Director, National Health Services Arden and Greater East Midlands Commissioning Support Unit, Warwick, UK

Hajar Mozaffar, Lecturer in Innovation, Business School, The University of Edinburgh, UK

Kathy Mason, Policy Advisor, National Health Services Arden and Greater East Midlands Commissioning Support Unit, Warwick, UK

Sally Eason, Partner Transformation and Innovation, National Health Services Arden and Greater East Midlands Commissioning Support Unit, Warwick, UK

Henry W. W. Potts, Senior Lecturer, University College London, London, UK

Robin Williams, Professor of Social Research on Technology, Institute for the Study of Science, Technology and Innovation, The University of Edinburgh, Edinburgh, UK

Corresponding author: Kathrin Cresswell (Kathrin.beyer@ed.ac.uk)

## Abstract

**Introduction:** Many countries are launching large-scale, digitally enabled change programmes as part of efforts to improve the quality, safety and efficiency of care. We have been commissioned to conduct an independent evaluation of a major national change programme, the Global Digital Exemplar (GDE) Programme, which aims to develop exemplary digital health solutions and encourage their wider adoption by creating a learning ecosystem across English National Health Service (NHS) provider organisations.

**Methods and analysis:** This theoretically-informed, qualitative, longitudinal formative evaluation comprises five interrelated work packages. We will conduct a combination of 12 in-depth and 23 broader qualitative case studies in GDE sites exploring digital transformation, local learning and mechanisms of spread of knowledge within the Programme and across the wider NHS. Data will be collected through a combination of semi-structured interviews with managers, implementation staff (clinical and non-clinical), vendors and policy makers, plus non-participant observations of meetings, site-visits, workshops, and documentary analysis of strategic local and national plans. Data will be analysed through a combination of inductive and deductive methods, beginning with in-depth case study sites and testing the findings against data from the wider sample and national stakeholders.

**Ethics and dissemination:** This work is commissioned as part of a national change programme and is therefore a service evaluation. We have ethical approval from the University of Edinburgh. Results will be disseminated at six-monthly intervals to national policymakers, and made available via our publicly accessible website. We will also identify lessons for the management and evaluation of large-scale evolving digital health change programmes that are of international relevance.

## Article summary

### Strengths and limitations of this study:

- A strength is that we will attempt to balance depth and breadth through conducting both detailed embedded case studies and “lighter touch” studies in a broader sample of provider organisations.
- The formative nature of the work means that the research team is planning to play an active role in shaping implementation strategy and the ongoing implementation of the GDE Programme, presenting a significant strength in terms of relevance and verification for decision-makers.
- A limitation is that the qualitative nature of the study can provide only limited insights into outcomes emerging during the course of the programme and further change over longer timeframes than the evaluation. It may also be difficult to disentangle the impact of the GDE Programme from other transformation initiatives running concomitantly.

## Introduction

Healthcare systems internationally strive for excellence. Excellence in health systems today is increasingly conceptualised in terms achieving the “triple aim” of better health outcomes, better value and better patient experience.(1) Policy initiatives throughout the economically-developed world have sought to speed up the journey to achieve these challenging goals through various digitisation strategies. These include for instance the Health Information Technology for Economic and Clinical Health (HITECH) Act in the United States (US), the National Programme for Information Technology (NPfIT) in England and Australia’s National Digital Health Strategy & Framework for Action.(2-4)

However, these strategies have shown varying levels of success. For instance, although the HITECH reform was successful in getting organisations to adopt electronic health records (EHRs), this and other studies have largely failed to demonstrate clinical benefits from these systems.(5) Similarly, the envisioned large-scale EHR adoption through centralised procurement of systems in the NPfIT in 2002 yielded unintended consequences, with early EHR systems showing difficulty fulfilling organisational and user needs, which ultimately led to a change in strategic direction in favour of more localised decision making.(4) Digitisation without central direction between 2011 and 2016 was also not very successful in England, as individual healthcare organisations had limited resources and capacity to implement and optimise digital systems.(6) Projects had focused on deployment rather than wider service improvement and a lack of standardisation also threatened the interoperability agenda.(7)

In 2016, the UK Government therefore commissioned the US physician Robert Wachter to lead an independent review of the state and future strategic direction of digital health strategy in England.(8) One of the key recommendations from this was to selectively invest available resources to create a cohort of digital centres of excellence. Consequently, in 2017, NHS England launched a flagship GDE Programme, with a further £200 million expansion announced in 2018.(9) The GDE Programme is a £395 million national investment designed to support selected digitally advanced provider organisations through funding and partnership opportunities to become Exemplars over two to three and a half years.(10) These provider organisations in the GDE Programme cover a variety of care settings including acute care, specialist care, mental health, and ambulance services. The underlying assumption was that digitally advanced sites would become international centres of excellence and create best practice models and learning for later implementers. GDE provider organisations (henceforth referred to as GDEs) were paired with somewhat less mature Fast Follower (FF) provider organisations to apply these advances. GDEs and FFs would capture best practice models and lessons in “Blueprints”, which would be disseminated within and beyond the Programme to accelerate the spread of this learning nationally. NHS England commissioned our team to evaluate this initiative.

The aim of our work is to conduct a formative evaluation of the GDE Programme. This includes exploring digital transformations in GDEs, the spread of learning among GDEs and FFs, and the establishment of a broader learning ecosystem. We will work jointly with NHS England and GDEs/FFs to discuss the implications of our findings and help the GDE Programme in achieving its vision. This will help to ensure that appropriate infrastructure and leadership is in place for sites to achieve international digital excellence.

## Methods and analysis

We will conduct a longitudinal qualitative formative evaluation, where GDEs and FFs will be conceptualised as case studies.(11) Our work will take place in five complementary work packages (WPs), summarised in Figure 1.

## Setting and participants

There are a total of 23 GDEs and 25 FFs in the Programme. We will collect in-depth data from a subset of 12 sites, and high-level data from the remainder. The in-depth sites will be sampled for maximum variation to represent a range of settings (e.g. acute, mental health, specialist) core EHR infrastructures, geographical locations, sizes, implementation timelines, and levels of digital maturity. A combination of GDEs and FFs will be included. Individual participants will include programme management staff within provider organisations (clinical and non-clinical), system vendors, and national stakeholders (e.g. programme managers and policy makers).

## Overall study design

We will undertake in-depth qualitative investigations in 12 provider organisations purposefully selected from all acute, specialist and mental health GDEs and FFs (WP2 in Figure 1). Ambulance organisations will be excluded as these were out of scope for this commission. We will complement these in-depth sites with more selective data collection across the entire sample of GDEs and FFs (WP1 in Figure 1), in order to balance depth of findings with the breadth of insights required to draw meaningful conclusions. Work in study sites will be complemented by data collection from the wider healthcare community, policy makers, vendors, and the international community (W5 in Figure 1).

We will use qualitative methods (comprising semi-structured interviews, observations and documentary analysis) to gather data on technology selection, implementation and adoption, change management strategy, governance processes and stakeholder engagement. We will also seek to explore the impact of contextual factors on change processes to facilitate the identification of critical success factors and dependencies so that we can provide outputs that have practical application to accelerate uptake and impact locally and nationally.

## Analytical framework

A conceptual/analytical framework and methodology informed by pertinent contemporary theoretical developments is important to guide the research and generate generalisable insights for policy and practice. We will therefore draw on a pragmatic application of a number of theories (Box 1). This approach has been successfully applied in our previous work and enables us to build on existing knowledge through obtaining theoretical insights (and thereby allowing generalisations) without neglecting the more immediate need to provide formative strategic input.(4)

### **Box 1: Conceptual approaches that we propose to draw on (13-15)**

Sociotechnical considerations – paying attention to social, technological and organisational processes and exploring how these influence each other over time.

An evolutionary perspective encompassing the evolving technology lifecycle – technology implementation, adoption and optimisation unfolds gradually over time offering opportunities for learning. These need to be examined over extended timeframes.(16)

Information infrastructures - how technologies emerge and how they together form “systems of systems”.(17)

Our formative evaluation will provide insights into how the continuing development of the GDE Programme may be enhanced to promote positive impacts on provider digitisation and patient outcomes. We will work closely with policy makers to develop a detailed understanding of the existing stakeholders, policy landscape, and evolving approaches to Programme management, so that we can



avoid duplicating the significant efforts made by programme management to monitor substantive outcomes. This detailed understanding of processes will help us to refine our overall approach, focusing on emerging local and national priorities whilst being mindful of implementation timelines.

We now describe the methods used in each of the WPs in more detail.

## WP1 - Exploring digital maturity, infrastructures and optimisation plans across all provider organisations taking part in the GDE Programme

### *Objectives*

GDEs and FFs are at various stages of system implementation and optimisation, with a range of different information infrastructures in place. In this WP, we seek to make assessments surrounding the success of the GDE Programme and gain insights into progress (or lack of).

### *Design*

In this WP, we will collect qualitative descriptive data from the acute and mental health GDEs and FFs that are not selected for WP2 in-depth case studies.

### *Sampling*

We will include all acute and mental health GDEs and FFs in this WP and purposefully sample members of the local programme team who have insights into existing systems and strategies (including chief information officers and their GDE management teams). Sites will be approached through our existing contacts at Arden and GEM Commissioning Support Unit, who are part of our team and already have established gatekeeper contacts.

### *Data collection*

Data collection will consist of gathering and analysing a range of documentation including Funding Agreements detailing provider organisations' transformation plans, strategies and digital maturity assessments and conducting a series of one-to-one in-depth semi-structured face-to-face or telephone interviews, group interviews (where preferred by sites) and site visits (see Box 2 for indicative topic guides). We will produce summaries describing the organisational context, technological systems, and digital strategies in each site. In order to assess individual journeys over time and to capture a longitudinal dimension, we will visit sites at the start of their GDE programme and re-visit sites at least six months after the implementation of GDE-related systems to gain insights into the evolving digital maturity and the delivery of key local benefits and outcomes.

### **Box 2: High-level interview guide**

#### Background

- Background and role of interviewee(s) (WP1, WP2)
- Digital trajectory/journey before Programme (WP1, WP2)

#### Strategy

- Details of change/implementation strategy and benefits realisation strategy (WP1, WP2)
- Implementation approach (resources, leadership, engagement, training, sustainability) (WP1, WP2)

#### Implementation progress

- Details of new digital functions being introduced as part of Programme and other current/recent changes (WP1, WP2)

- Progress in implementing these (WP1, WP2)
  - Issues arising in implementation (WP1, WP2)
- Overall thoughts on Programme (rationale, aims, how it has gone so far and what could be done better) (WP2)
- Benefits realisation and reporting (WP2)
- Benefits achieved through functionalities
  - Challenges in realising these benefits
  - Facilitators for achieving benefits
- Blueprinting
- Overview of Blueprint production and use (WP1, WP2)
  - Experiences of the Blueprinting process (challenges, areas for improvement) (WP2)
- Knowledge management, networking and learning (formal and informal)
- Existing networks/learning and key stakeholders (within Programme and outside Programme) (WP1, WP2)
  - Relationship between FF and GDE organisations (WP1, WP2)
  - Experiences and perceptions on what knowledge networks are most useful and why (WP2)
  - Other relationships/sources of information (WP2)
  - Perception of how national support can promote knowledge exchange and networking (WP2)
- Vendors (WP2)
- Relationship with vendors
  - Views on national digital health infrastructure
- Lessons learnt and way forward
- Key lessons learnt to date (WP1, WP2)
  - Perceptions around what support is needed (WP 2)
  - Best ways to spread learning (WP 2)
  - View on the sustainability of benefits (WP 2)
  - Perception of if/how benefits have been realised (WP 2)
  - Unintended consequences (WP 2)

## WP2 - Exploring digital transformation plans and their execution

### *Objectives*

To measure progress in a more focused way, we will examine change processes and specific clinical outcomes in selected settings in-depth.

### *Design*

We will use a combination of qualitative interviews and non-participant observation of strategic meetings to explore organisational strategies, clinical end-user experiences, implementation/use/optimisation progress, and perceived individual/organisational benefits/outcomes over time (Box 2).

### *Sampling*

This WP is concerned with getting an insight into change processes in a sample of 12 purposefully selected case study sites, aiming for maximum variation. Within each site, we will sample participants purposefully to represent a range of viewpoints (e.g. different clinical and managerial backgrounds) and levels of seniority. Gatekeepers will be approached to help us establish initial contacts and we will snowball sample based on these. As participants will need to have insights into the GDE Programme, we expect to focus sampling on members of local strategic committees and IT management staff. We will stop recruiting new participants when no new themes are emerging and when we have reached thematic saturation.(18)

### *Data collection*

Data collection will consist of a combination of one-to-one semi-structured face-to-face or telephone interviews, group interviews (where preferred by participants), observations of GDE-related meetings and workshops, and collection of documents. Designated lead researchers will collect data in in-depth case study sites in order to allow them to immerse themselves in the setting.

Researchers will audio-record interviews and group interviews and prepare accompanying field notes. A professional transcribing service will produce transcripts of these recordings. Interviews will allow us to gain detailed insights into participant attitudes towards the Programme, their expectations, local complexities, perceived benefits, unexpected consequences, challenges experienced, and lessons learnt.

Lead researchers will conduct non-participant observations either in person or online. This approach will allow us to understand dynamics within sites (e.g. when observing meetings of local management groups). During observations, researchers will take detailed field notes relating to content, social dynamics, and their own impressions, by considering the observation within the wider context of the overall evaluation work.

In addition to interviews and observations, we will also collect local documents that will allow us to understand strategies and implementation/optimisation plans. We will use these as contextual background reading to inform interview topic guides and interpretations of observations.

## WP3 - Exploring spread of learning

### *Objectives*

To explore knowledge sharing and dissemination of lessons and networking activity across GDE and FF sites.

### *Design*

We will undertake secondary analysis of data collected in WPs 1 and 2 to explore mechanisms associated with the spread of knowledge. It will draw on qualitative data collected in WPs 1 and 2 to extract spread and sharing of knowledge between sites through formal and informal mechanisms produced through targeted programme activities identified in the analysis of documents. Key lines of enquiry will include exploring instances where knowledge transfer and spread was perceived as successful/unsuccessful and exploring the underlying reasons why.

## WP4 - Exploring the establishment of a broader learning ecosystem

### *Objectives*

Here, we seek to understand how the Programme is contributing to the establishment of a wider digital health learning ecosystem within and beyond the GDE Programme, including both the formal knowledge transfer mechanisms planned under the Programme and informal knowledge exchanges that may emerge.

### *Design*

Secondary analysis of formal and informal means of sharing knowledge identified in WP3 and of data collected in WPs 1 and 2 to examine the formation and operation of learning and knowledge networks across the GDE Programme and with the wider NHS and other communities. Key lines of enquiry will include examining stakeholder experiences and overall patterns to address the (variable) dynamism of learning, and the incentives for and barriers to effective knowledge sharing.

## WP5 - Strategic implications of our findings for achieving the Programme vision

### *Objectives*

This final WP is concerned with the integration and dissemination of findings from the evaluation. We will work to connect the results from WPs 1-4, with a view to mapping out the wider overall picture and establishing the enduring themes that offer useful insights to those who will plan, manage, and participate in future digital health deployments.

### *Design*

This WP will be a qualitative longitudinal study comprising qualitative interviews, observations and collection of documents. Discussions with key stakeholders will examine how historical and contextual factors shape the processes underway and help explicate implications of emerging findings for policy.

### *Sampling*

In this final WP, we will engage with a wide range of stakeholders including policy makers, national programme management staff, system vendors, the wider NHS, international hospitals and partner organisations, and academics. These will be recruited with the help of key national gatekeepers in our Steering Group or approached directly by us via publicly available email addresses.

### *Data collection*

We will conduct one-to-one semi-structured interviews with researchers taking detailed field notes. In addition, we will also conduct ethnographic fieldwork including attending all national programme management meetings, and national conferences and workshops that are related to the GDE Programme. Collection of national strategic plans will complement interviews and observations. This WP will help us position our findings within the existing policy landscape and within the history of digital change in the NHS. It will also allow exploring evolving strategies and changes over time. We will use our conceptual frameworks to interlink the various elements and develop formative recommendations for policymaking.

### *Data analysis*

Data analysis will be iterative and feed into subsequent data collection, using a combination of deductive and inductive methods.<sup>(19)</sup> We will develop a theory-informed coding framework (drawing on categories developed in our ongoing work) in which lead researchers will code qualitative data

1  
2  
3 from all WPs, whilst allowing additional categories to emerge.(20) This will be achieved by each  
4 researcher coding an initial sample of transcribed interviews, and then collectively developing  
5 additional emerging categories. We will use NVivo software Version 11 to facilitate the process of  
6 coding qualitative data.(21)  
7

8 During three-monthly intensive analysis meetings with the wider team (i.e. all of the authors), we will  
9 discuss emerging findings and distil implications for policymaking. These will then be collated and  
10 synthesised for feedback to the Steering Group of the evaluation, which comprises senior national  
11 programme managers and internationally renowned academics. The role of this group will be to  
12 consider this formative feedback regularly and (where relevant) incorporate insights into strategic  
13 decision making. Members will also help to direct the research towards areas where it can achieve  
14 maximum impact.  
15

16 Analysis meetings will initially have a relatively broad focus, with increasing depth over time, focusing  
17 in on issues identified as important by the Steering Group and the research team. In line with the aims  
18 of this work, we will initially explore digital transformation within sites, before analysing spread of  
19 learning across GDE and FF sites, and then analyse how the Programme has helped (or not) to establish  
20 a wider learning digital health ecosystem. We will focus on challenges and unanticipated  
21 consequences in most detail. The in-depth case studies will allow us to get detailed insight into local  
22 dynamics that we will then test across the wider sample, seeking confirming and disconfirming  
23 evidence.  
24

## 25 Ethics and dissemination

26 This work is a service evaluation of a national programme and therefore does not require review by  
27 an NHS research ethics committee. We received institutional ethical approval from The School of  
28 Social and Political Science Research Ethics Committee at The University of Edinburgh, UK. We will  
29 adhere to good practice and relevant ethical guidelines in obtaining verbal informed consent for  
30 participation, as well as anonymising individuals and sites prior to any dissemination. Data will be  
31 stored on university servers.  
32

33 We will submit written reports of our emerging findings to our quarterly Steering Group meetings. We  
34 will also seek to publish the written reports on our publicly accessible website.(22) In addition, we will  
35 develop a detailed publication strategy for validating and disseminating key findings in academic peer  
36 reviewed journals.  
37

## 38 Strengths and limitations

39 Conducting a combination of broad and in-depth case studies will allow us to balance breadth and  
40 depth. A further strength is the formative nature of this work, where the research team will seek to  
41 play an active role in shaping the strategy and ongoing implementation of the GDE Programme.  
42 However, a limitation is that the qualitative methods used for formative evaluation are unlikely to  
43 provide detailed substantive information about the impact/eventual outcomes of the programme  
44 (which may be difficult to disentangle from the impact of other initiatives). We may also encounter  
45 difficulties as the GDE Programme is still unfolding and may be subject to delays and/or changes in  
46 direction. This may require flexibility in the implementation of the evaluation design.  
47

## 48 Contributions to the literature

49 Although digital health change programmes are increasingly large scale, there is a dearth of evidence  
50 around how these often evolving programmes can be managed and evaluated in order to maximise  
51 their benefits.(23) The initiative being studied represents the largest attempt to create a concerted  
52

1  
2  
3 digital learning ecosystem. There may be a missed opportunity to learn from previous large-scale  
4 initiatives both nationally and internationally.(24) For example, the English NHS has been involved in  
5 a range of initiatives to promote digitisation with varying levels of success over the last 20 years but  
6 key tensions, for example around balancing national and local ownership and priorities, have not yet  
7 been resolved.(4) This work will, we hope, help to address this gap and also allow to identify factors  
8 which may impede or accelerate digitisation, characteristics of learning, knowledge flows and  
9 associated networks.  
10  
11

12 Our evaluation will also contribute to discussions around conceptualising digital maturity, a concept  
13 that has to date been poorly defined but is needed by policymakers and programme managers to  
14 establish baselines and demonstrate progress of change initiatives.(25) We hope to advance the  
15 literature in defining the concept, highlight emerging issues, and develop implications for measuring  
16 digital maturity in hospitals.  
17  
18

19 In-depth case studies will further help to shed light on ongoing tensions in the process of digital  
20 transformation and associated contexts, mechanisms and outcomes.(26) Of particular interest will be  
21 areas where there are no identified “recipes for success” such as leadership, clinical engagement,  
22 vendor market management, and governance.(15)  
23

24 The evaluation will also identify internationally relevant lessons that may inform attempts to establish  
25 digital health learning ecosystems elsewhere, drawn from this programme as the first national  
26 attempt to create a concerted national digital health learning ecosystem. Organisational learning in  
27 health systems and knowledge flows have received little attention within the healthcare domain to  
28 date, but this area is likely to gain importance as concerted efforts to develop learning ecosystems will  
29 increase internationally in order to promote learning and accelerate digitally enabled change.  
30  
31

## 32 Conclusions

33 The GDE Programme is the first concerted effort to develop a national digital health-learning  
34 ecosystem. Our real-time national evaluation of this initiative provides an important opportunity to  
35 feed research findings into policymaking and thereby maximise impact.  
36  
37  
38  
39  
40  
41  
42

43 **Contributors:** KC, RW and AS conceived this paper. KC and RW led the drafting of the manuscript and all authors commented  
44 on drafts of the manuscript.  
45

46 **Conflict of interests:** All authors are investigators on the evaluation of the GDE programme  
47 (<https://www.ed.ac.uk/usher/digital-exemplars>). AS was a member of the Working Group that produced *Making IT Work*,  
48 and was an assessor in selecting GDE sites. BDF supervises a PhD student partly funded by Cerner, unrelated to this paper.  
49  
50

51 **Funding:** This article has drawn on a programme of independent research funded by NHS England. The views expressed are  
52 those of the author(s) and not necessarily those of the NHS, NHS England, or NHS Digital. This work was also supported by  
53 the National Institute for Health Research (NIHR) Imperial Patient Safety Translational Research Centre. The views expressed  
54 in this publication are those of the authors and not necessarily those of the NHS, the NIHR or the Department of Health and  
55 Care.  
56  
57  
58  
59

60 **Acknowledgements:** We gratefully acknowledge the input of the Steering Group of this evaluation.

1  
2  
3  
4  
5  
6  
7  
8  
9  
10  
11  
12  
13  
14  
15  
16  
17  
18  
19  
20  
21  
22  
23  
24  
25  
26  
27  
28  
29  
30  
31  
32  
33  
34  
35  
36  
37  
38  
39  
40  
41  
42  
43  
44  
45  
46  
47  
48  
49  
50  
51  
52  
53  
54  
55  
56  
57  
58  
59  
60

For peer review only

## References

1. Berwick DM, Nolan TW, Whittington J. The triple aim: care, health, and cost. *Health affairs*. 2008 May;27(3):759-69.
2. Blumenthal D. Launching HITECH. *New England Journal of Medicine*. 2010 Feb 4;362(5):382-5.
3. Framework for Action. Available from: <https://conversation.digitalhealth.gov.au/framework-for-action> (last accessed: 07/05/2020).
4. Sheikh A, Cornford T, Barber N, Avery A, Takian A, Lichtner V, Petrakaki D, Crowe S, Marsden K, Robertson A, Morrison Z. Implementation and adoption of nationwide electronic health records in secondary care in England: final qualitative results from prospective national evaluation in "early adopter" hospitals. *Bmj*. 2011 Oct 17;343:d6054.
5. Menemeyer ST, Menachemi N, Rahurkar S, Ford EW. Impact of the HITECH act on physicians' adoption of electronic health records. *Journal of the American Medical Informatics Association*. 2016 Mar 1;23(2):375-9.
6. A digital NHS? An introduction to the digital agenda and plans for implementation. Available from: [https://www.kingsfund.org.uk/sites/default/files/field/field\\_publication\\_file/A\\_digital\\_NHS\\_Kings\\_Fund\\_Sep\\_2016.pdf](https://www.kingsfund.org.uk/sites/default/files/field/field_publication_file/A_digital_NHS_Kings_Fund_Sep_2016.pdf) (last accessed: 07/05/2020).
7. Hunt announces £4.2 billion for NHS IT. Available from: <https://www.digitalhealth.net/2016/02/hunt-announces-4-2-billion-for-nhs-it/> (last accessed: 07/05/2020).
8. National Advisory Group on Health Information Technology in England, Making IT Work: Harnessing the Power of Health Information Technology to Improve Care in England. 2016. Available from: [https://assets.publishing.service.gov.uk/government/uploads/system/uploads/attachment\\_data/file/550866/Wachter\\_Review\\_Accessible.pdf](https://assets.publishing.service.gov.uk/government/uploads/system/uploads/attachment_data/file/550866/Wachter_Review_Accessible.pdf) (last accessed: 07/05/2020).
9. NHS England planning further waves of Global Digital Exemplars. Available from: <https://www.digitalhealth.net/2018/08/nhs-england-planning-further-waves-of-global-digital-exemplars/> (last accessed: 07/05/2020).
10. Global Digital Exemplars. Available from: <https://www.england.nhs.uk/digitaltechnology/connecteddigitalsystems/exemplars/> (last accessed: 07/05/2020).
11. Crowe S, Cresswell K, Robertson A, Huby G, Avery A, Sheikh A. The case study approach. *BMC medical research methodology*. 2011 Dec;11(1):100.
12. Cresswell KM, Bates DW, Williams R, Morrison Z, Slee A, Coleman J, Robertson A, Sheikh A. Evaluation of medium-term consequences of implementing commercial computerized physician order entry and clinical decision support prescribing systems in two 'early adopter' hospitals. *Journal of the American Medical Informatics Association*. 2014 Oct 1;21(e2):e194-202.
13. Cresswell KM, Sheikh A. Undertaking sociotechnical evaluations of health information technologies. *Journal of Innovation in Health Informatics*. 2014 Mar 18;21(2):78-83.
14. Ciborra C, Braa K, Cordella A, Hepsø V, Dahlbom B, Failla A, Hanseth O, Ljungberg J, Monteiro E. From control to drift: The dynamics of corporate information infrastructures. Oxford University Press on Demand; 2000.
15. Cresswell KM, Bates DW, Sheikh A. Ten key considerations for the successful implementation and adoption of large-scale health information technology. *Journal of the American Medical Informatics Association*. 2013 Jun 1;20(e1):e9-13.



16. Robin Williams, James Stewart, Roger Slack, *Social Learning in Technological Innovation: Experimenting with Information and Communication Technologies*, 2005, Edward Elgar: Aldershot.
17. Pollock N, Williams R. E-infrastructures: How do we know and understand them? *Strategic ethnography and the biography of artefacts. Computer Supported Cooperative Work (CSCW)*. 2010 Dec 1;19(6):521-56.
18. Hennink MM, Kaiser BN, Marconi VC. Code saturation versus meaning saturation: how many interviews are enough?. *Qualitative health research*. 2017 Mar;27(4):591-608.
19. Miles MB, Huberman AM. *Qualitative data analysis: An expanded sourcebook*. Sage; 1994 Jan 12.
20. Developing and applying a formative evaluation framework for health information technology implementations – The Technology, People, Organizations and Macro-environmental factors (TPOM) Framework. [https://learn-eu-central-1-prod-fleet01-xythos.s3-eu-central-1.amazonaws.com/59ee0bbbe41e2/25464?response-content-disposition=inline%3B%20filename%2A%3DUTF-8%27%27untitled.pdf&response-content-type=application%2Fpdf&X-Amz-Algorithm=AWS4-HMAC-SHA256&X-Amz-Date=20200507T140114Z&X-Amz-SignedHeaders=host&X-Amz-Expires=21600&X-Amz-Credential=AKIAZH6WM4PLYI3L4QWN%2F20200507%2Fcentral-1%2Fs3%2Faws4\\_request&X-Amz-Signature=f1036e5fd240b8bf8e64f94a897b7eb8bc7f4c8167b0cee2c76ffa9a84f6ffb9](https://learn-eu-central-1-prod-fleet01-xythos.s3-eu-central-1.amazonaws.com/59ee0bbbe41e2/25464?response-content-disposition=inline%3B%20filename%2A%3DUTF-8%27%27untitled.pdf&response-content-type=application%2Fpdf&X-Amz-Algorithm=AWS4-HMAC-SHA256&X-Amz-Date=20200507T140114Z&X-Amz-SignedHeaders=host&X-Amz-Expires=21600&X-Amz-Credential=AKIAZH6WM4PLYI3L4QWN%2F20200507%2Fcentral-1%2Fs3%2Faws4_request&X-Amz-Signature=f1036e5fd240b8bf8e64f94a897b7eb8bc7f4c8167b0cee2c76ffa9a84f6ffb9) (last accessed: 07/05/2020).
21. NVivo. Available from: <https://www.qsrinternational.com/nvivo-qualitative-data-analysis-software/home> (last accessed: 07/05/2020).
22. Global Digital Exemplar Evaluation. Available from: <https://www.ed.ac.uk/usher/digital-exemplars> (last accessed: 07/05/2020).
23. Ammenwerth E, Rigby M. Evaluation of implementation of health IT. *Evidence-Based Health Informatics*. 2016 May 20;11:206.
24. Coiera E, Ammenwerth E, Georgiou A, Magrabi F. Does health informatics have a replication crisis?. *Journal of the American Medical Informatics Association*. 2018 Aug;25(8):963-8.
25. Cresswell K, Sheikh A, Krasuska M, Heeney C, Franklin BD, Lane W, Mozaffar H, Mason K, Eason S, Hinder S, Potts HW. Reconceptualising the digital maturity of health systems. *The Lancet Digital Health*. 2019 Sep 1;1(5):e200-1.
26. Kim MO, Coiera E, Magrabi F. Problems with health information technology and their effects on care delivery and patient outcomes: a systematic review. *Journal of the American Medical Informatics Association*. 2017 Mar 1;24(2):246-50.

Figure 1: High-level overview of our methods in each of five work packages (WPs)

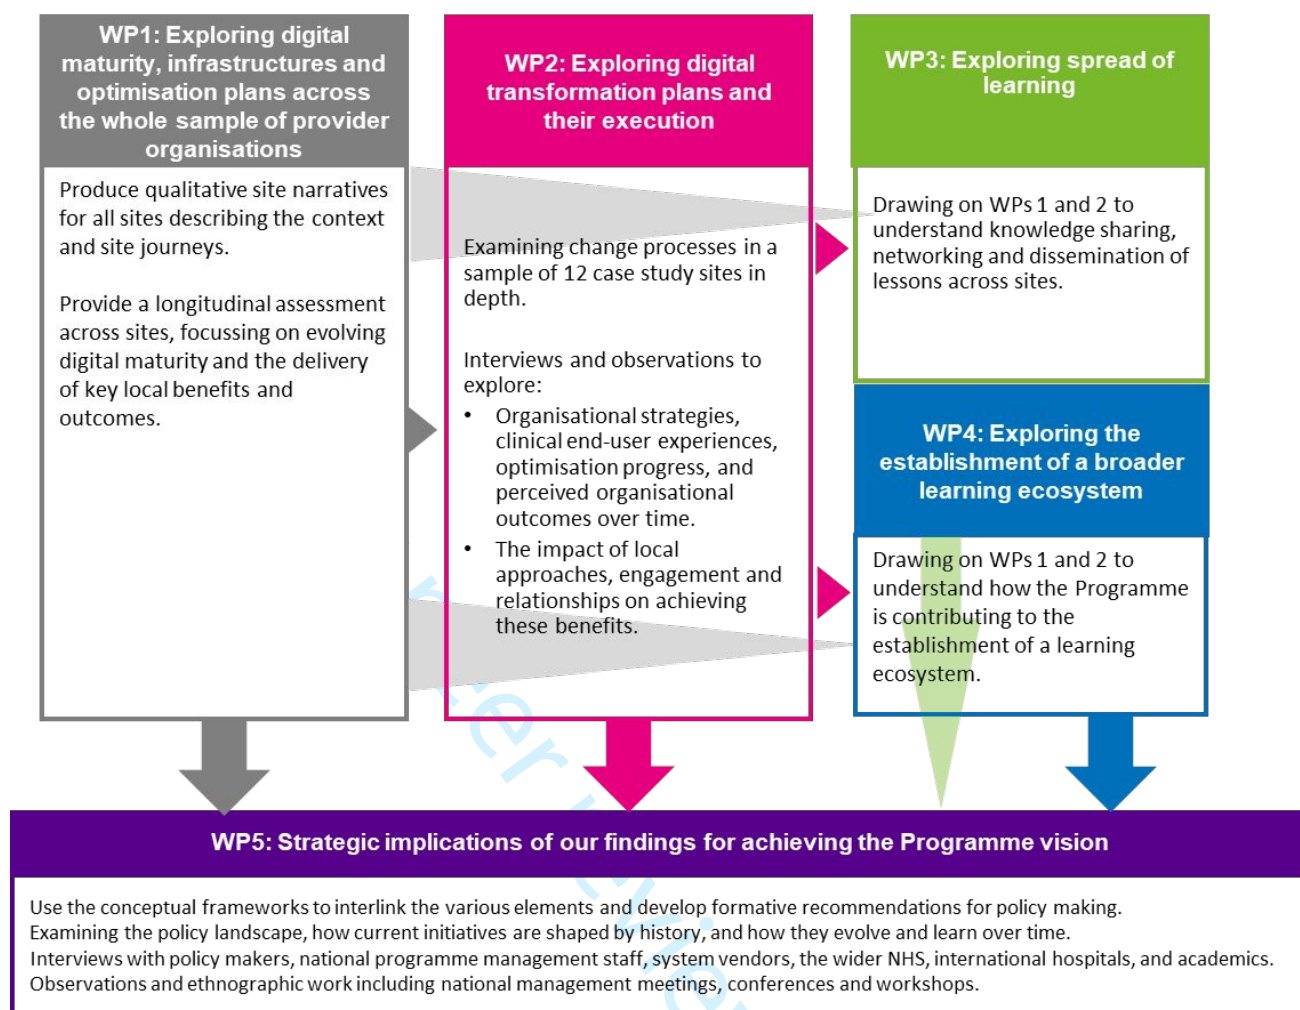

# BMJ Open

## The formative independent evaluation of a digital change programme in the English National Health Service: Study protocol for a longitudinal qualitative study

|                                 |                                                                                                                                                                                                                                                                                                                                                                                                                                                                                                                                                    |
|---------------------------------|----------------------------------------------------------------------------------------------------------------------------------------------------------------------------------------------------------------------------------------------------------------------------------------------------------------------------------------------------------------------------------------------------------------------------------------------------------------------------------------------------------------------------------------------------|
| Journal:                        | <i>BMJ Open</i>                                                                                                                                                                                                                                                                                                                                                                                                                                                                                                                                    |
| Manuscript ID                   | bmjopen-2020-041275.R1                                                                                                                                                                                                                                                                                                                                                                                                                                                                                                                             |
| Article Type:                   | Protocol                                                                                                                                                                                                                                                                                                                                                                                                                                                                                                                                           |
| Date Submitted by the Author:   | 03-Aug-2020                                                                                                                                                                                                                                                                                                                                                                                                                                                                                                                                        |
| Complete List of Authors:       | Cresswell, Kathrin; University of Edinburgh, Sheikh, Aziz; University of Edinburgh, Division of Community Health Sciences<br>Dean Franklin, Bryony; University College London School of Pharmacy, Krasuska, Marta<br>Nguyen, Hung<br>Hinder, Susan<br>Lane, Wendy<br>Mozaffar, Hajar; University of Edinburgh<br>Mason, Kathy<br>Eason, Sally<br>Potts, Henry; UCL, Centre for Health Informatics and Multiprofessional Education<br>Williams, Robin; University of Edinburgh, School of Social and Political Science; The University of Edinburgh |
| <b>Primary Subject Heading</b>: | Health informatics                                                                                                                                                                                                                                                                                                                                                                                                                                                                                                                                 |
| Secondary Subject Heading:      | Qualitative research, Health informatics, Health services research                                                                                                                                                                                                                                                                                                                                                                                                                                                                                 |
| Keywords:                       | QUALITATIVE RESEARCH, Health informatics < BIOTECHNOLOGY & BIOINFORMATICS, Health policy < HEALTH SERVICES ADMINISTRATION & MANAGEMENT                                                                                                                                                                                                                                                                                                                                                                                                             |
|                                 |                                                                                                                                                                                                                                                                                                                                                                                                                                                                                                                                                    |

SCHOLARONE™  
Manuscripts

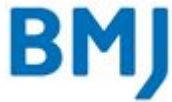

I, the Submitting Author has the right to grant and does grant on behalf of all authors of the Work (as defined in the below author licence), an exclusive licence and/or a non-exclusive licence for contributions from authors who are: i) UK Crown employees; ii) where BMJ has agreed a CC-BY licence shall apply, and/or iii) in accordance with the terms applicable for US Federal Government officers or employees acting as part of their official duties; on a worldwide, perpetual, irrevocable, royalty-free basis to BMJ Publishing Group Ltd ("BMJ") its licensees and where the relevant Journal is co-owned by BMJ to the co-owners of the Journal, to publish the Work in this journal and any other BMJ products and to exploit all rights, as set out in our [licence](#).

The Submitting Author accepts and understands that any supply made under these terms is made by BMJ to the Submitting Author unless you are acting as an employee on behalf of your employer or a postgraduate student of an affiliated institution which is paying any applicable article publishing charge ("APC") for Open Access articles. Where the Submitting Author wishes to make the Work available on an Open Access basis (and intends to pay the relevant APC), the terms of reuse of such Open Access shall be governed by a Creative Commons licence – details of these licences and which [Creative Commons](#) licence will apply to this Work are set out in our licence referred to above.

Other than as permitted in any relevant BMJ Author's Self Archiving Policies, I confirm this Work has not been accepted for publication elsewhere, is not being considered for publication elsewhere and does not duplicate material already published. I confirm all authors consent to publication of this Work and authorise the granting of this licence.

1  
2  
3  
4  
5  
6  
7  
8  
9  
10  
11  
12  
13  
14  
15  
16  
17  
18  
19  
20  
21  
22  
23  
24  
25  
26  
27  
28  
29  
30  
31  
32  
33  
34  
35  
36  
37  
38  
39  
40  
41  
42  
43  
44  
45  
46  
47  
48  
49  
50  
51  
52  
53  
54  
55  
56  
57  
58  
59  
60

## The formative independent evaluation of a digital change programme in the English National Health Service: Study protocol for a longitudinal qualitative study

Kathrin Cresswell, Chief Scientist Office Chancellor's Fellow, Director of Innovation, Usher Institute of Population Health Sciences and Informatics, The University of Edinburgh, UK

Aziz Sheikh, Professor of Primary Care Research & Development and Director, Usher Institute of Population Health Sciences and Informatics, The University of Edinburgh, UK

Bryony Dean Franklin, Professor of Medication Safety, UCL School of Pharmacy, London, UK and Theme Lead, NIHR Imperial Patient Safety Translational Research Centre.

Marta Krasuska, Research Fellow, Usher Institute of Population Health Sciences and Informatics, The University of Edinburgh, UK

Hung The Nguyen, Research Fellow, Institute for the Study of Science, Technology and Innovation, The University of Edinburgh, Edinburgh, UK

Susan Hinder, Research Fellow, Institute for the Study of Science, Technology and Innovation, The University of Edinburgh, Edinburgh, UK

Wendy Lane, Consultancy Services Director, National Health Services Arden and Greater East Midlands Commissioning Support Unit, Warwick, UK

Hajar Mozaffar, Lecturer in Innovation, Business School, The University of Edinburgh, UK

Kathy Mason, Policy Advisor, National Health Services Arden and Greater East Midlands Commissioning Support Unit, Warwick, UK

Sally Eason, Partner Transformation and Innovation, National Health Services Arden and Greater East Midlands Commissioning Support Unit, Warwick, UK

Henry W. W. Potts, Senior Lecturer, University College London, London, UK

Robin Williams, Professor of Social Research on Technology, Institute for the Study of Science, Technology and Innovation, The University of Edinburgh, Edinburgh, UK

Corresponding author: Kathrin Cresswell (Kathrin.beyer@ed.ac.uk)

## Abstract

**Introduction:** Many countries are launching large-scale, digitally enabled change programmes as part of efforts to improve the quality, safety and efficiency of care. We have been commissioned to conduct an independent evaluation of a major national change programme, the Global Digital Exemplar (GDE) Programme, which aims to develop exemplary digital health solutions and encourage their wider adoption by creating a learning ecosystem across English National Health Service (NHS) provider organisations.

**Methods and analysis:** This theoretically-informed, qualitative, longitudinal formative evaluation comprises five interrelated work packages. We will conduct a combination of 12 in-depth and 23 broader qualitative case studies in GDE sites exploring digital transformation, local learning and mechanisms of spread of knowledge within the Programme and across the wider NHS. Data will be collected through a combination of semi-structured interviews with managers, implementation staff (clinical and non-clinical), vendors and policy makers, plus non-participant observations of meetings, site-visits, workshops, and documentary analysis of strategic local and national plans. Data will be analysed through a combination of inductive and deductive methods, beginning with in-depth case study sites and testing the findings against data from the wider sample and national stakeholders.

**Ethics and dissemination:** This work is commissioned as part of a national change programme and is therefore a service evaluation. We have ethical approval from the University of Edinburgh. Results will be disseminated at six-monthly intervals to national policymakers, and made available via our publicly accessible website. We will also identify lessons for the management and evaluation of large-scale evolving digital health change programmes that are of international relevance.

## Article summary

### Strengths and limitations of this study:

- A strength is that we will attempt to balance depth and breadth through conducting both detailed embedded case studies and “lighter touch” studies in a broader sample of provider organisations.
- The formative nature of the work means that the research team is planning to play an active role in shaping implementation strategy and the ongoing implementation of the GDE Programme, presenting a significant strength in terms of relevance and verification for decision-makers.
- A limitation is that the qualitative nature of the study can provide only limited insights into outcomes emerging during the course of the programme and further change over longer timeframes than the evaluation. It may also be difficult to disentangle the impact of the GDE Programme from other transformation initiatives running concomitantly.

## Introduction

Healthcare systems internationally strive for excellence. Excellence in health systems today is increasingly conceptualised in terms achieving the “triple aim” of better health outcomes, better value and better patient experience.(1) Policy initiatives throughout the economically-developed world have sought to speed up the journey to achieve these challenging goals through various digitisation strategies. These include for instance the Health Information Technology for Economic and Clinical Health (HITECH) Act in the United States (US), the National Programme for Information Technology (NPfIT) in England and Australia’s National Digital Health Strategy & Framework for Action.(2-4)

However, these strategies have shown varying levels of success. For instance, although the HITECH reform was successful in getting organisations to adopt electronic health records (EHRs), this and other studies have largely failed to demonstrate clinical benefits from these systems.(5) Similarly, the envisioned large-scale EHR adoption through centralised procurement of systems in the NPfIT in 2002 yielded unintended consequences, with early EHR systems showing difficulty fulfilling organisational and user needs, which ultimately led to a change in strategic direction in favour of more localised decision making.(4) Digitisation without central direction between 2011 and 2016 was also not very successful in England, as individual healthcare organisations had limited resources and capacity to implement and optimise digital systems.(6) Projects had focused on deployment rather than wider service improvement and a lack of standardisation also threatened the interoperability agenda.(7)

In 2016, the UK Government therefore commissioned the US physician Robert Wachter to lead an independent review of the state and future strategic direction of digital health strategy in England.(8) One of the key recommendations from this was to selectively invest available resources to create a cohort of digital centres of excellence. Consequently, in 2017, NHS England launched a flagship GDE Programme, with a further £200 million expansion announced in 2018.(9) The GDE Programme is a £395 million national investment designed to establish selected digitally advanced provider organisations through funding and partnership opportunities to become Exemplars over two to three and a half years.(10) These provider organisations in the GDE Programme cover a variety of care settings including acute care, specialist care, mental health, and ambulance services. The underlying assumption was that digitally advanced sites would become international centres of excellence and create best practice models and learning for later implementers. GDE provider organisations (henceforth referred to as GDEs) were paired with somewhat less mature Fast Follower (FF) provider organisations to apply these advances. GDEs and FFs would capture best practice models and lessons in “Blueprints”, which would be disseminated within and beyond the Programme to accelerate the spread of this learning nationally. NHS England commissioned our team to evaluate this initiative.

The aim of our work, which has commenced in 2018 and is due to complete in 2021, is to conduct a formative evaluation of the GDE Programme. This includes exploring digital transformations in GDEs, the spread of learning among GDEs and FFs, and the establishment of a broader learning ecosystem. We will work jointly with NHS England and GDEs/FFs to discuss the implications of our findings and help the GDE Programme in achieving its vision. This will help to ensure that appropriate infrastructure and leadership is in place for sites to achieve international digital excellence.

## Methods and analysis

We will conduct a longitudinal qualitative formative evaluation, where GDEs and FFs will be conceptualised as case studies.(11) This format allows us to explore implementation, adoption and optimisation processes in context and to extract potentially transferable lessons associated with developments over time. For the purposes of evaluating the GDE Programme, we conceptualise each



1  
2  
3 provider organisation as a case, where we can analyse context, processes and outcomes. We expect  
4 that each case will include a range of small-scale technology innovations as well as, in some instances,  
5 renewal of electronic health record infrastructures. We have significant experience with the case  
6 study method and have employed it successfully in previous work investigating large-scale digital  
7 health change programmes.(4,12)  
8

9  
10 Our work will take place in five complementary work packages (WPs), summarised in Figure 1.

## 11 Patient and public involvement

12  
13 No patient involved.

## 14 Setting and participants

15  
16 There are a total of 23 GDEs and 25 FFs in the Programme. We will collect in-depth data from a sub-  
17 set of 12 sites, and high-level data from the remainder. The in-depth sites will be sampled purposefully  
18 for maximum variation to represent a range of settings (e.g. acute, mental health, specialist) core EHR  
19 infrastructures, geographical locations, sizes, implementation timelines, and levels of digital maturity.  
20 In doing so, we will seek representation of sites with large commercial integrated and Best-of-Breed  
21 systems; sites located in the South, Midlands and North of England; teaching and non-teaching  
22 provider organizations; and comparatively low, medium- and high-levels of baseline digital maturity.  
23 A combination of GDEs and FFs will be included. Individual participants will include programme  
24 management staff within provider organisations (clinical and non-clinical), system vendors, and  
25 national stakeholders (e.g. programme managers and policy makers).  
26  
27  
28  
29

## 30 Overall study design

31  
32 We will undertake in-depth qualitative investigations in 12 provider organisations purposefully  
33 selected from all acute, specialist and mental health GDEs and FFs (WP2 in Figure 1). Ambulance  
34 organisations will be excluded as these were out of scope for this commission. We will complement  
35 these in-depth sites with more selective data collection across the entire sample of GDEs and FFs (WP1  
36 in Figure 1), in order to balance depth of findings with the breadth of insights required to draw  
37 meaningful conclusions. Work in study sites will be complemented by data collection from the wider  
38 healthcare community, policy makers, vendors, and the international community (W5 in Figure 1).  
39  
40

41 We will use qualitative methods (comprising semi-structured interviews, observations and  
42 documentary analysis) to gather data on technology selection, implementation and adoption, change  
43 management strategy, governance processes and stakeholder engagement. We will also seek to  
44 explore the impact of contextual factors on change processes to facilitate the identification of critical  
45 success factors and dependencies so that we can provide outputs that have practical application to  
46 accelerate uptake and impact locally and nationally.  
47  
48

## 49 Analytical framework

50  
51 A conceptual/analytical framework and methodology informed by pertinent contemporary  
52 theoretical developments is important to guide the research and generate generalisable insights for  
53 policy and practice. We will therefore draw on a pragmatic application of a number of theories (Box  
54 1).(13-15) This approach has been successfully applied in our previous work and enables us to build  
55 on existing knowledge through obtaining theoretical insights (and thereby allowing generalisations)  
56 without neglecting the more immediate need to provide formative strategic input.(4) In integrating  
57 these approaches, we will explore how various technological systems and social structures co-evolve  
58  
59  
60

over time shaping each other throughout a continuous process. This will be achieved through applying a theory-informed coding framework developed in related work (see analysis section below).

**Box 1: Conceptual approaches that we propose to draw on**

Sociotechnical considerations – paying attention to social, technological and organisational processes and exploring how these influence each other over time.

An evolutionary perspective encompassing the evolving technology lifecycle – technology implementation, adoption and optimisation unfolds gradually over time offering opportunities for learning. These need to be examined over extended timeframes.(16)

Information infrastructures - how technologies emerge and how they together form “systems of systems”.(17)

Our formative evaluation will provide insights into how the continuing development of the GDE Programme may be enhanced to promote positive impacts on provider digitisation and patient outcomes. We will work closely with policy makers to develop a detailed understanding of the existing stakeholders, policy landscape, and evolving approaches to Programme management, so that we can avoid duplicating the significant efforts made by programme management to monitor substantive outcomes. This detailed understanding of processes will help us to refine our overall approach, focusing on emerging local and national priorities whilst being mindful of implementation timelines.

We now describe the methods used in each of the WPs in more detail.

## WP1 - Exploring digital maturity, infrastructures and optimisation plans across all provider organisations taking part in the GDE Programme

### *Objectives*

GDEs and FFs are at various stages of system implementation and optimisation, with a range of different information infrastructures in place. In this WP, we seek to make assessments surrounding the success of the GDE Programme and gain insights into progress (or lack of).

### *Design*

In this WP, we will collect qualitative descriptive data from the acute and mental health GDEs and FFs that are not selected for WP2 in-depth case studies.

### *Sampling*

We will include all acute and mental health GDEs and FFs in this WP and purposefully sample members of the local programme team who have insights into existing systems and strategies (including chief information officers and their GDE management teams). Sites will be approached through our existing contacts at Arden and GEM Commissioning Support Unit, who are part of our team and already have established gatekeeper contacts.

### *Data collection*

Data collection will consist of gathering and analysing a range of documentation including Funding Agreements detailing provider organisations’ transformation plans, strategies and digital maturity assessments and conducting a series of one-to-one in-depth semi-structured face-to-face or telephone interviews, group interviews (where preferred by sites) and site visits (see Box 2 for indicative topic guides). We will produce summaries describing the organisational context,

1  
2  
3 technological systems, and digital strategies in each site. In order to assess individual journeys over  
4 time and to capture a longitudinal dimension, we will visit sites at the start of their GDE programme  
5 and re-visit sites at least six months after the implementation of GDE-related systems to gain insights  
6 into the evolving digital maturity and the delivery of key local benefits and outcomes.  
7

### 8 **Box 2: High-level interview guide**

#### 9 **Background**

- 10 • Background and role of interviewee(s) (WP1, WP2)
- 11 • Digital trajectory/journey before Programme (WP1, WP2)

#### 12 **Strategy**

- 13 • Details of change/implementation strategy and benefits realisation strategy (WP1, WP2)
- 14 • Implementation approach (resources, leadership, engagement, training, sustainability) (WP1, WP2)

#### 15 **Implementation progress**

- 16 • Details of new digital functions being introduced as part of Programme and other current/recent changes (WP1, WP2)
- 17 • Progress in implementing these (WP1, WP2)
- 18 • Issues arising in implementation (WP1, WP2)

19 Overall thoughts on Programme (rationale, aims, how it has gone so far and what could be done better) (WP2)

#### 20 **Benefits realisation and reporting (WP2)**

- 21 • Benefits achieved through functionalities
- 22 • Challenges in realising these benefits
- 23 • Facilitators for achieving benefits

#### 24 **Blueprinting**

- 25 • Overview of Blueprint production and use (WP1, WP2)
- 26 • Experiences of the Blueprinting process (challenges, areas for improvement) (WP2)

#### 27 **Knowledge management, networking and learning (formal and informal)**

- 28 • Existing networks/learning and key stakeholders (within Programme and outside Programme) (WP1, WP2)
- 29 • Relationship between FF and GDE organisations (WP1, WP2)
- 30 • Experiences and perceptions on what knowledge networks are most useful and why (WP2)
- 31 • Other relationships/sources of information (WP2)
- 32 • Perception of how national support can promote knowledge exchange and networking (WP2)

#### 33 **Vendors (WP2)**

- 34 • Relationship with vendors
- 35 • Views on national digital health infrastructure

#### 36 **Lessons learnt and way forward**

- 37 • Key lessons learnt to date (WP1, WP2)
- 38 • Perceptions around what support is needed (WP 2)
- 39 • Best ways to spread learning (WP 2)
- 40 • View on the sustainability of benefits (WP 2)
- 41 • Perception of if/how benefits have been realised (WP 2)

- Unintended consequences (WP 2)

## WP2 - Exploring digital transformation plans and their execution

### *Objectives*

To measure progress in a more focused way, we will examine change processes and specific clinical outcomes in selected settings in-depth.

### *Design*

We will use a combination of qualitative interviews and non-participant observation of strategic meetings to explore organisational strategies, clinical end-user experiences, implementation/use/optimisation progress, and perceived individual/organisational benefits/outcomes over time (Box 2). We aim to investigate perceived outcomes, so it is difficult to anticipate what these may be in advance. We expect that many will be qualitative as quantitative outcomes tend to materialise over long timeframes. Patient outcomes in particular are unlikely to emerge during the conduct of this work but we may observe some improvement in organisational performance.(18)

### *Sampling*

This WP is concerned with getting an insight into change processes in a sample of 12 purposefully selected case study sites, aiming for maximum variation as outlined above.

Within each site, we will sample participants purposefully to represent a range of viewpoints (e.g. different clinical and managerial backgrounds) and levels of seniority. Gatekeepers will be approached to help us establish initial contacts and we will snowball sample based on these. As participants will need to have insights into the GDE Programme, we expect to focus sampling on members of local strategic committees and IT management staff. We will stop recruiting new participants when no new themes are emerging and when we have reached thematic saturation.(19)

### *Data collection*

Data collection will consist of a combination of one-to-one semi-structured face-to-face or telephone interviews, group interviews (where preferred by participants), observations of GDE-related meetings and workshops, and collection of documents. Designated lead researchers will collect data in in-depth case study sites in order to allow them to immerse themselves in the setting.

Researchers will audio-record interviews and group interviews and prepare accompanying field notes. A professional transcribing service will produce transcripts of these recordings. Interviews will allow us to gain detailed insights into participant attitudes towards the Programme, their expectations, local complexities, perceived benefits, unexpected consequences, challenges experienced, and lessons learnt.

Lead researchers will conduct non-participant observations either in person or online. This approach will allow us to understand dynamics within sites (e.g. when observing meetings of local management groups). During observations, researchers will take detailed field notes relating to content, social dynamics, and their own impressions, by considering the observation within the wider context of the overall evaluation work.

1  
2  
3 In addition to interviews and observations, we will also collect local documents that will allow us to  
4 understand strategies and implementation/optimisation plans. We will use these as contextual  
5 background reading to inform interview topic guides and interpretations of observations.  
6  
7

### 8 WP3 - Exploring spread of learning

#### 9 *Objectives*

10 To explore knowledge transfer and dissemination of lessons and networking activity across GDE and  
11 FF sites.  
12  
13

#### 14 *Design*

15 We will undertake secondary analysis of data collected in WPs 1 and 2 to explore mechanisms  
16 associated with knowledge transfer. This will draw on qualitative data collected in WPs 1 and 2 to  
17 extract spread and sharing of knowledge between sites through formal and informal mechanisms  
18 produced through targeted programme activities identified in the analysis of documents. Key lines of  
19 enquiry will include exploring instances where knowledge transfer and spread was perceived as  
20 successful/unsuccessful and exploring the underlying reasons why.  
21  
22  
23

### 24 WP4 - Exploring the establishment of a broader learning ecosystem

#### 25 *Objectives*

26 Here, we seek to understand how the Programme is contributing to the establishment of a wider  
27 digital health learning ecosystem within and beyond the GDE Programme, including both the formal  
28 knowledge transfer mechanisms planned under the Programme and informal knowledge exchanges  
29 that may emerge. We conceptualise a learning ecosystem as inter-organisational knowledge transfer  
30 and learning that occurs over time across the entire health system (i.e. not only the GDE sites).  
31  
32  
33

#### 34 *Design*

35 Secondary analysis of formal and informal means of sharing knowledge identified in WP3 and of data  
36 collected in WPs 1 and 2 to examine the formation and operation of learning and knowledge networks  
37 across the GDE Programme and with the wider NHS and other communities. Key lines of enquiry will  
38 include examining stakeholder experiences and overall patterns to address the (variable) dynamism  
39 of learning, and the incentives for and barriers to effective knowledge transfer.  
40  
41  
42

### 43 WP5 - Strategic implications of our findings for achieving the Programme vision

#### 44 *Objectives*

45 This final WP is concerned with the integration and dissemination of findings from the evaluation. We  
46 will work to connect the results from WPs 1-4, with a view to mapping out the wider overall picture  
47 and establishing the enduring themes that offer useful insights to those who will plan, manage, and  
48 participate in future digital health deployments.  
49  
50  
51

#### 52 *Design*

53 This WP will be a qualitative longitudinal study comprising qualitative interviews, observations and  
54 collection of documents. Discussions with key stakeholders will examine how historical and contextual  
55 factors shape the processes underway and help explicate implications of emerging findings for policy.  
56  
57  
58  
59  
60

### Sampling

In this final WP, we will engage with a wide range of stakeholders including policy makers, national programme management staff, system vendors, the wider NHS, international hospitals and partner organisations, and academics. These will be recruited with the help of key national gatekeepers in our Steering Group or approached directly by us via publicly available email addresses.

### Data collection

We will conduct one-to-one semi-structured interviews with researchers taking detailed field notes. In addition, we will also conduct ethnographic fieldwork including attending all national programme management meetings, and national conferences and workshops that are related to the GDE Programme. Collection of national strategic plans will complement interviews and observations. This WP will help us position our findings within the existing policy landscape and within the history of digital change in the NHS. It will also allow exploring evolving strategies and changes over time. We will use our conceptual frameworks to interlink the various elements and develop formative recommendations for policymaking. These recommendations will be fed back through written reports and face-to-face meetings with senior policy makers, with whom we have established relationships.

### Data analysis

Data analysis will be iterative and feed into subsequent data collection, using a combination of deductive and inductive methods.<sup>(20)</sup> We will develop a theory-informed coding framework in which lead researchers will code qualitative data from all WPs, whilst allowing additional categories to emerge. We will draw on the Technology, People, Organisations, and Macro-environmental factors (TPOM) evaluation framework we have developed in related work (Box 3). This includes various sub-categories that will be used as prospective criteria against which assessments will be made.<sup>(21)</sup>

#### **Box 3: Overview of categories in the Technology, People, Organisations, and Macro-environmental factors (TPOM) evaluation framework (21)**

**Technological factors:** usability; performance; adaptability and flexibility; dependability, data availability, integrity, and confidentiality; data accuracy; sustainability; security

**Social/human factors:** user satisfaction; complete/correct use; attitudes and expectations; engagement; experiences; workload/benefits; work processes; user input in design

**Organisational context:** leadership and management; communication; timelines; vision; training and support; champions; resources; monitoring and optimisation

**Wider macro-environment:** media; professional groups; political context; economic considerations and incentives; legal and regulatory aspects; vendors; measuring impact

Documentary, observation, and interview data will be collated for each case by the lead researcher and coded against the TPOM framework, allowing additional categories to emerge. Documents, observations, and interviews from WP5 will be analysed separately and integrated with findings from case studies. We will seek to feed back and test emerging findings into concurrent data collection.

We will use NVivo software Version 11 to facilitate the process of coding qualitative data.<sup>(22)</sup>

During three-monthly intensive analysis meetings with the wider team (i.e. all of the authors), we will discuss emerging findings and distil implications for policymaking. These will then be collated and synthesised for feedback to the Steering Group of the evaluation, which comprises senior national programme managers and internationally renowned academics. The role of this group will be to

1  
2  
3 consider this formative feedback regularly and (where relevant) incorporate insights into strategic  
4 decision making. Members will also help to direct the research towards areas where it can achieve  
5 maximum impact.  
6

7 Analysis meetings will initially have a relatively broad focus, with increasing depth over time, focusing  
8 in on issues identified as important by the Steering Group and the research team. In line with the aims  
9 of this work, we will initially explore digital transformation within sites, before analysing spread of  
10 learning across GDE and FF sites, and then analyse how the Programme has helped (or not) to establish  
11 a wider learning digital health ecosystem. We will focus on challenges and unanticipated  
12 consequences in most detail. The in-depth case studies will allow us to get detailed insight into local  
13 dynamics that we will then test across the wider sample, seeking confirming and disconfirming  
14 evidence.  
15  
16  
17

## 18 Ethics and dissemination

19 This work is a service evaluation of a national programme and therefore does not require review by  
20 an NHS research ethics committee. We received institutional ethical approval from The School of  
21 Social and Political Science Research Ethics Committee at The University of Edinburgh, UK. We will  
22 adhere to good practice and relevant ethical guidelines in obtaining verbal informed consent for  
23 participation, as well as anonymising individuals and sites prior to any dissemination. Data will be  
24 stored on university servers.  
25  
26  
27

28 We will submit written reports of our emerging findings to our quarterly Steering Group meetings. We  
29 will also seek to publish the written reports on our publicly accessible website.<sup>(23)</sup> In addition, we will  
30 develop a detailed publication strategy for validating and disseminating key findings in academic peer  
31 reviewed journals.  
32  
33

## 34 Strengths and limitations

35 Conducting a combination of broad and in-depth case studies will allow us to balance breadth and  
36 depth. A further strength is the formative nature of this work, where the research team will seek to  
37 play an active role in shaping the strategy and ongoing implementation of the GDE Programme.  
38 However, a limitation is that the qualitative methods used for formative evaluation are unlikely to  
39 provide detailed substantive information about the impact/eventual outcomes of the programme  
40 (which may be difficult to disentangle from the impact of other initiatives). We may also encounter  
41 difficulties as the GDE Programme is still unfolding and may be subject to delays and/or changes in  
42 direction. This may require flexibility in the implementation of the evaluation design.  
43  
44  
45

## 46 Contributions to the literature

47 Although digital health change programmes are increasingly large scale, there is a dearth of evidence  
48 around how these often evolving programmes can be managed and evaluated in order to maximise  
49 their benefits.<sup>(24)</sup> The initiative being studied represents the largest attempt to create a concerted  
50 digital learning ecosystem. There may be a missed opportunity to learn from previous large-scale  
51 initiatives both nationally and internationally.<sup>(25)</sup> For example, the English NHS has been involved in  
52 a range of initiatives to promote digitisation with varying levels of success over the last 20 years but  
53 key tensions, for example around balancing national and local ownership and priorities, have not yet  
54 been resolved.<sup>(4)</sup> This work will, we hope, help to address this gap and also allow to identify factors  
55 which may impede or accelerate digitisation, characteristics of learning, knowledge flows and  
56 associated networks.  
57  
58  
59  
60

1  
2  
3 Our evaluation will also contribute to discussions around conceptualising digital maturity, a concept  
4 that has to date been poorly defined but is needed by policymakers and programme managers to  
5 establish baselines and demonstrate progress of change initiatives.(26) We hope to advance the  
6 literature in defining the concept, highlight emerging issues, and develop implications for measuring  
7 digital maturity in hospitals.  
8  
9

10 In-depth case studies will further help to shed light on ongoing tensions in the process of digital  
11 transformation and associated contexts, mechanisms and outcomes.(27) Of particular interest will be  
12 areas where there are no identified “recipes for success” such as leadership, clinical engagement,  
13 vendor market management, and governance.(15)  
14

15 The evaluation will also identify internationally relevant lessons that may inform attempts to establish  
16 digital health learning ecosystems elsewhere, drawn from this programme as the first national  
17 attempt to create a concerted national digital health learning ecosystem. Organisational learning in  
18 health systems and knowledge flows have received little attention within the healthcare domain to  
19 date, but this area is likely to gain importance as concerted efforts to develop learning ecosystems will  
20 increase internationally in order to promote learning and accelerate digitally enabled change.  
21  
22

## 23 Conclusions

24 The GDE Programme is the first concerted effort to develop a national digital health-learning  
25 ecosystem. Our real-time national evaluation of this initiative provides an important opportunity to  
26 feed research findings into policymaking and thereby maximise impact.  
27  
28  
29  
30  
31  
32  
33

34 **Contributors:** KC, RW and AS conceived this paper. KC and RW led the drafting of the manuscript and BDF, MK, HN, SH, WL,  
35 HM, KM, SE and HP commented on drafts of the manuscript.  
36

37 **Conflict of interests:** All authors are investigators on the evaluation of the GDE programme  
38 (<https://www.ed.ac.uk/usher/digital-exemplars>). AS was a member of the Working Group that produced *Making IT Work*,  
39 and was an assessor in selecting GDE sites. BDF supervises a PhD student partly funded by Cerner, unrelated to this paper.  
40  
41  
42

43 **Funding:** This article has drawn on a programme of independent research funded by NHS England (grant number not  
44 applicable). The views expressed are those of the author(s) and not necessarily those of the NHS, NHS England, or NHS Digital.  
45 This work was also supported by the National Institute for Health Research (NIHR) Imperial Patient Safety Translational  
46 Research Centre. The views expressed in this publication are those of the authors and not necessarily those of the NHS, the  
47 NIHR or the Department of Health and Care.  
48  
49

50  
51 **Acknowledgements:** We gratefully acknowledge the input of the Steering Group of this evaluation.  
52  
53  
54  
55  
56  
57  
58  
59  
60



## References

1. Berwick DM, Nolan TW, Whittington J. The triple aim: care, health, and cost. *Health affairs*. 2008 May;27(3):759-69.
2. Blumenthal D. Launching HITECH. *New England Journal of Medicine*. 2010 Feb 4;362(5):382-5.
3. Framework for Action. Available from: <https://conversation.digitalhealth.gov.au/framework-for-action> (last accessed: 07/05/2020).
4. Sheikh A, Cornford T, Barber N, Avery A, Takian A, Lichtner V, Petrakaki D, Crowe S, Marsden K, Robertson A, Morrison Z. Implementation and adoption of nationwide electronic health records in secondary care in England: final qualitative results from prospective national evaluation in "early adopter" hospitals. *Bmj*. 2011 Oct 17;343:d6054.
5. Menemeyer ST, Menachemi N, Rahurkar S, Ford EW. Impact of the HITECH act on physicians' adoption of electronic health records. *Journal of the American Medical Informatics Association*. 2016 Mar 1;23(2):375-9.
6. A digital NHS? An introduction to the digital agenda and plans for implementation. Available from: [https://www.kingsfund.org.uk/sites/default/files/field/field\\_publication\\_file/A\\_digital\\_NHS\\_Kings\\_Fund\\_Sep\\_2016.pdf](https://www.kingsfund.org.uk/sites/default/files/field/field_publication_file/A_digital_NHS_Kings_Fund_Sep_2016.pdf) (last accessed: 07/05/2020).
7. Hunt announces £4.2 billion for NHS IT. Available from: <https://www.digitalhealth.net/2016/02/hunt-announces-4-2-billion-for-nhs-it/> (last accessed: 07/05/2020).
8. National Advisory Group on Health Information Technology in England, Making IT Work: Harnessing the Power of Health Information Technology to Improve Care in England. 2016. Available from: [https://assets.publishing.service.gov.uk/government/uploads/system/uploads/attachment\\_data/file/550866/Wachter\\_Review\\_Accessible.pdf](https://assets.publishing.service.gov.uk/government/uploads/system/uploads/attachment_data/file/550866/Wachter_Review_Accessible.pdf) (last accessed: 07/05/2020).
9. NHS England planning further waves of Global Digital Exemplars. Available from: <https://www.digitalhealth.net/2018/08/nhs-england-planning-further-waves-of-global-digital-exemplars/> (last accessed: 07/05/2020).
10. Global Digital Exemplars. Available from: <https://www.england.nhs.uk/digitaltechnology/connecteddigitalsystems/exemplars/> (last accessed: 07/05/2020).
11. Crowe S, Cresswell K, Robertson A, Huby G, Avery A, Sheikh A. The case study approach. *BMC medical research methodology*. 2011 Dec;11(1):100.
12. Cresswell KM, Bates DW, Williams R, Morrison Z, Slee A, Coleman J, Robertson A, Sheikh A. Evaluation of medium-term consequences of implementing commercial computerized physician order entry and clinical decision support prescribing systems in two 'early adopter' hospitals. *Journal of the American Medical Informatics Association*. 2014 Oct 1;21(e2):e194-202.
13. Cresswell KM, Sheikh A. Undertaking sociotechnical evaluations of health information technologies. *Journal of Innovation in Health Informatics*. 2014 Mar 18;21(2):78-83.
14. Ciborra C, Braa K, Cordella A, Hepsø V, Dahlbom B, Failla A, Hanseth O, Ljungberg J, Monteiro E. From control to drift: The dynamics of corporate information infrastructures. Oxford University Press on Demand; 2000.
15. Cresswell KM, Bates DW, Sheikh A. Ten key considerations for the successful implementation and adoption of large-scale health information technology. *Journal of the American Medical Informatics Association*. 2013 Jun 1;20(e1):e9-13.

16. Robin Williams, James Stewart, Roger Slack, Social Learning in Technological Innovation: Experimenting with Information and Communication Technologies, 2005, Edward Elgar: Aldershot.
17. Pollock N, Williams R. E-infrastructures: How do we know and understand them? Strategic ethnography and the biography of artefacts. *Computer Supported Cooperative Work (CSCW)*. 2010 Dec 1;19(6):521-56.
18. Black AD, Car J, Pagliari C, Anandan C, Cresswell K, Bokun T, McKinstry B, Procter R, Majeed A, Sheikh A. The impact of eHealth on the quality and safety of health care: a systematic overview. *PLoS med*. 2011 Jan 18;8(1):e1000387.
19. Hennink MM, Kaiser BN, Marconi VC. Code saturation versus meaning saturation: how many interviews are enough?. *Qualitative health research*. 2017 Mar;27(4):591-608.
20. Miles MB, Huberman AM. *Qualitative data analysis: An expanded sourcebook*. Sage; 1994 Jan 12.
21. Cresswell K, Williams R, Sheikh A. Developing and Applying a Formative Evaluation Framework for Health Information Technology Implementations: Qualitative Investigation. *Journal of Medical Internet Research*. 2020;22(6):e15068.
22. NVivo. Available from: <https://www.qsrinternational.com/nvivo-qualitative-data-analysis-software/home> (last accessed: 07/05/2020).
23. Global Digital Exemplar Evaluation. Available from: <https://www.ed.ac.uk/usher/digital-exemplars> (last accessed: 07/05/2020).
24. Ammenwerth E, Rigby M. Evaluation of implementation of health IT. *Evidence-Based Health Informatics*. 2016 May 20;11:206.
25. Coiera E, Ammenwerth E, Georgiou A, Magrabi F. Does health informatics have a replication crisis?. *Journal of the American Medical Informatics Association*. 2018 Aug;25(8):963-8.
26. Cresswell K, Sheikh A, Krasuska M, Heeney C, Franklin BD, Lane W, Mozaffar H, Mason K, Eason S, Hinder S, Potts HW. Reconceptualising the digital maturity of health systems. *The Lancet Digital Health*. 2019 Sep 1;1(5):e200-1.
27. Kim MO, Coiera E, Magrabi F. Problems with health information technology and their effects on care delivery and patient outcomes: a systematic review. *Journal of the American Medical Informatics Association*. 2017 Mar 1;24(2):246-50.

Figure 1: High-level overview of our methods in each of five work packages (WPs)

For peer review only

Figure 1: High-level overview of our methods in each of five work packages (WPs)

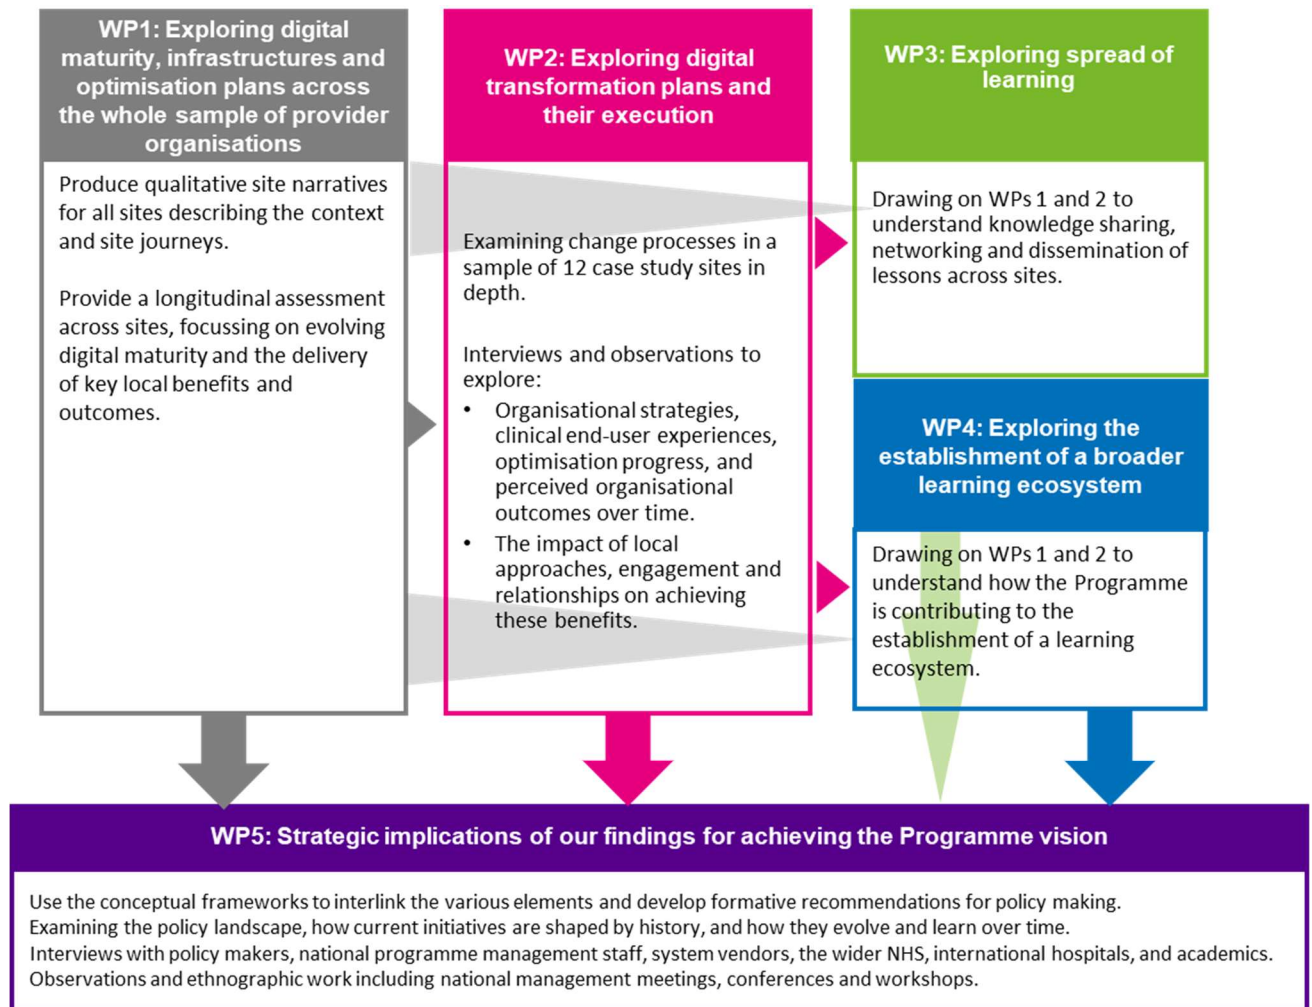

Supplement: bmjopen-2020-041275.draft_revisions.pdf [file bmjopen-2020-041275.draft_revisions.pdf]
